# Supplementary material
Source: publisher figshare collection journal article supplement (https://acs.figshare.com/ndownloader/files/4695079)

Figure 5D. Tapping mode 3D height AFM images of the P(AMPS<sub>37</sub>-co-TBA<sub>63</sub>)/PCA<sub>5</sub> complex particles, with a molar ratio between charges  $n^-/n^+ = 1.2$  and TAR = 3.8 mL PA/mL PC.h, adsorbed on the silicon wafers.

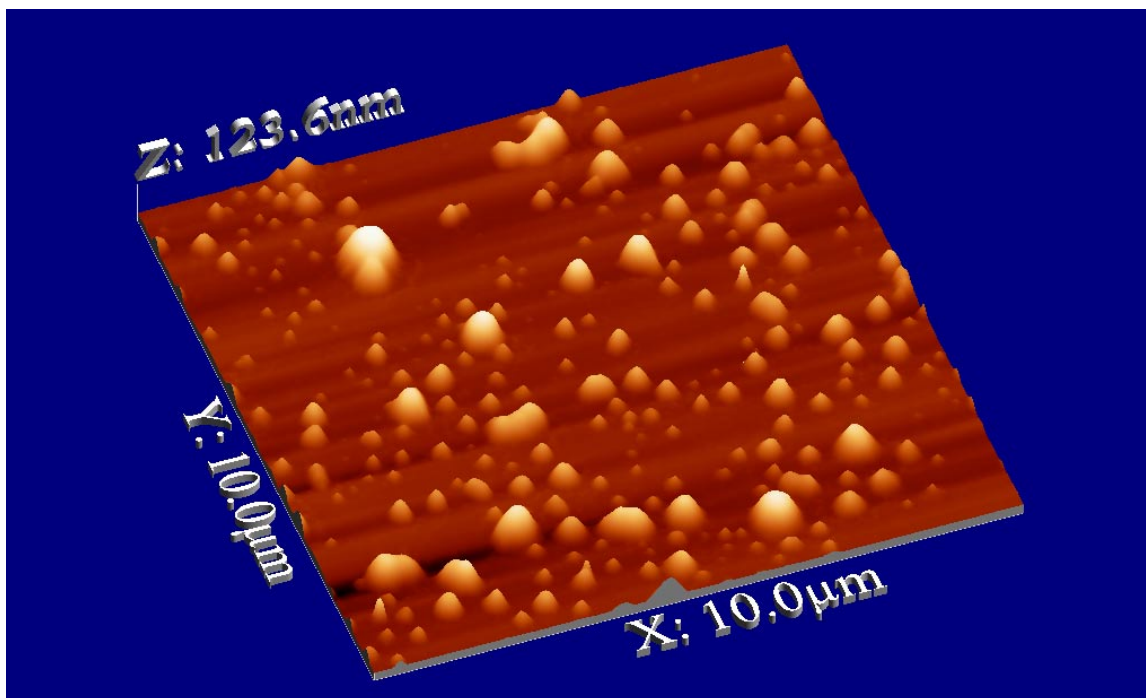

Supplement: Supplementary file 1 [file 4695079]
